# Supplementary material
Source: PubMed Central journal article supplement (PMC6472925)

---

# Slide Presentation courtesy of the Texas Peer Assistance Program for Nurses

Used with permission

# Sobering Data

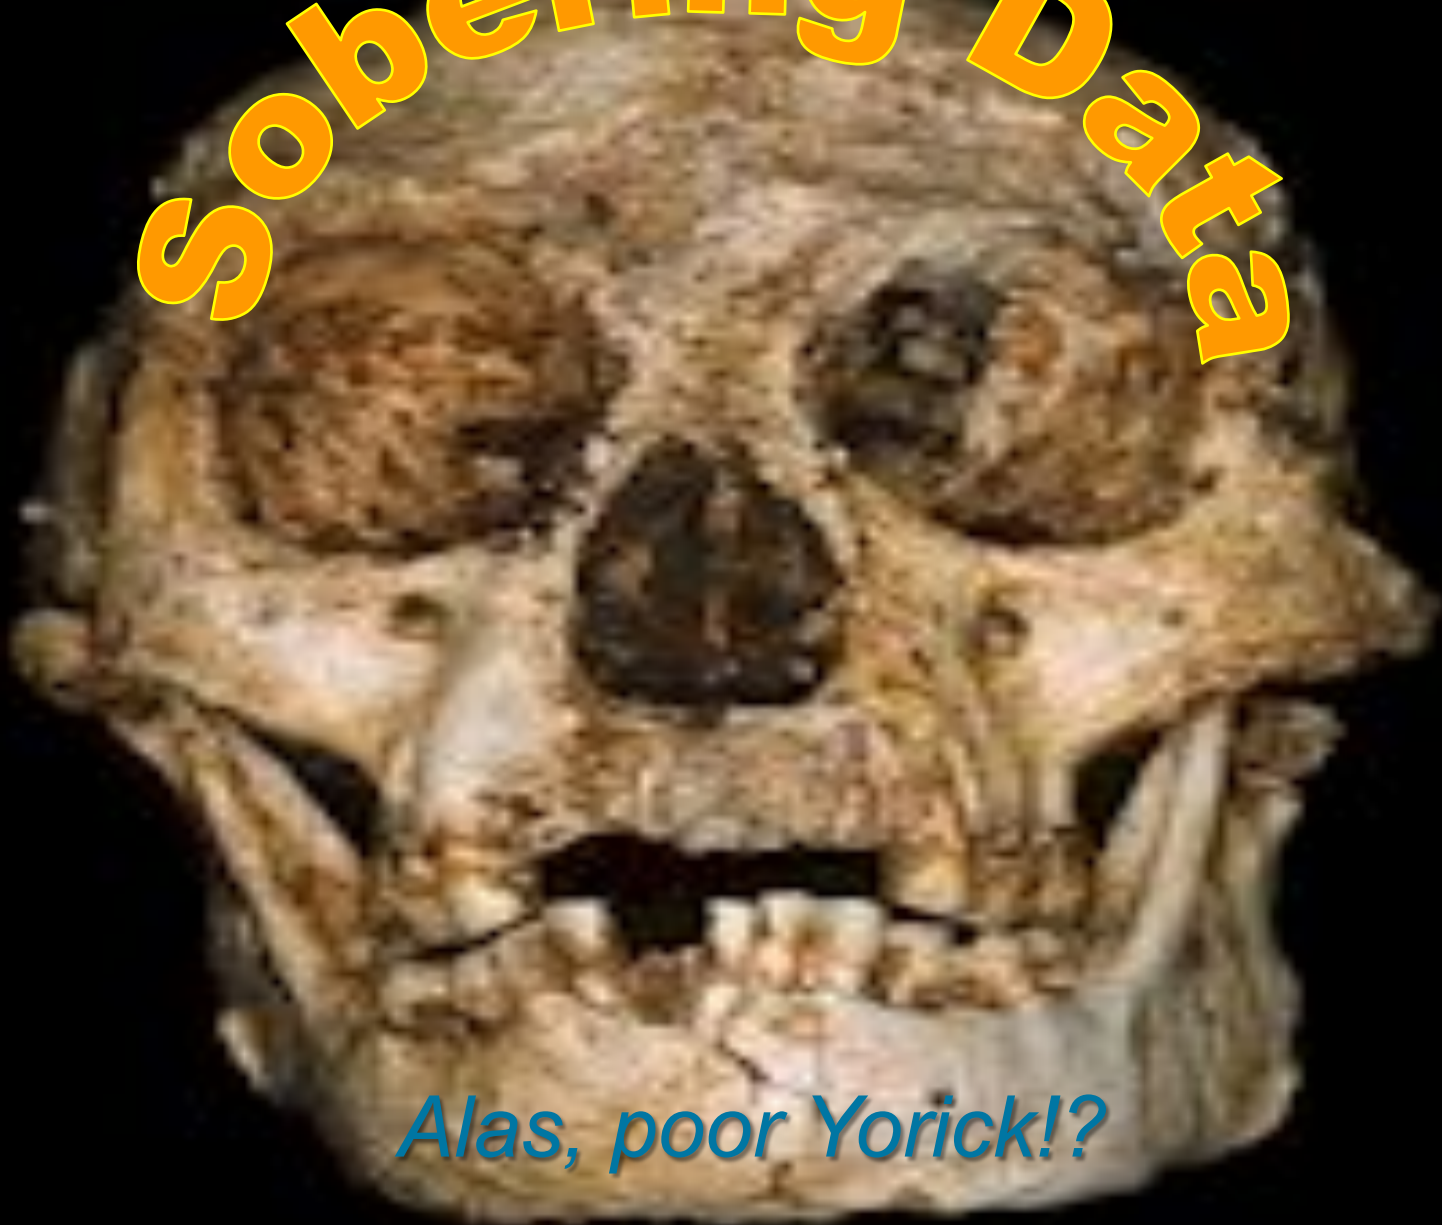

*Alas, poor Yorick!?*



# LET'S START AT THE VERY BEGINNING

The use and abuse of alcohol, tobacco and other drugs is the number **ONE** public health problem in the US.

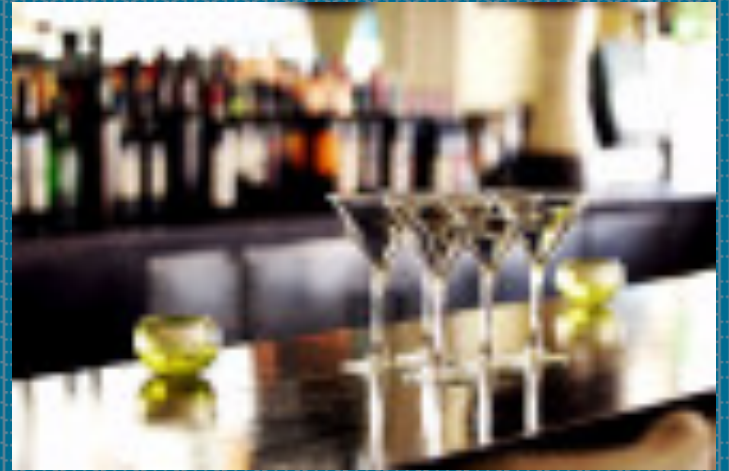

*-RWJF*

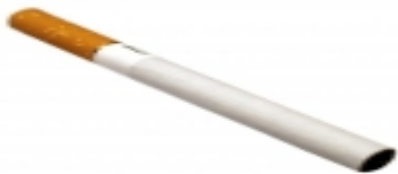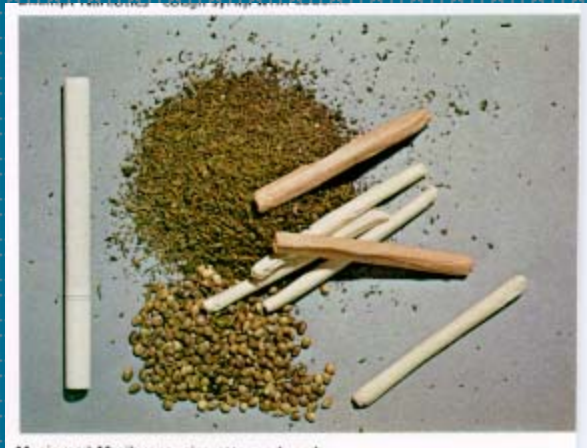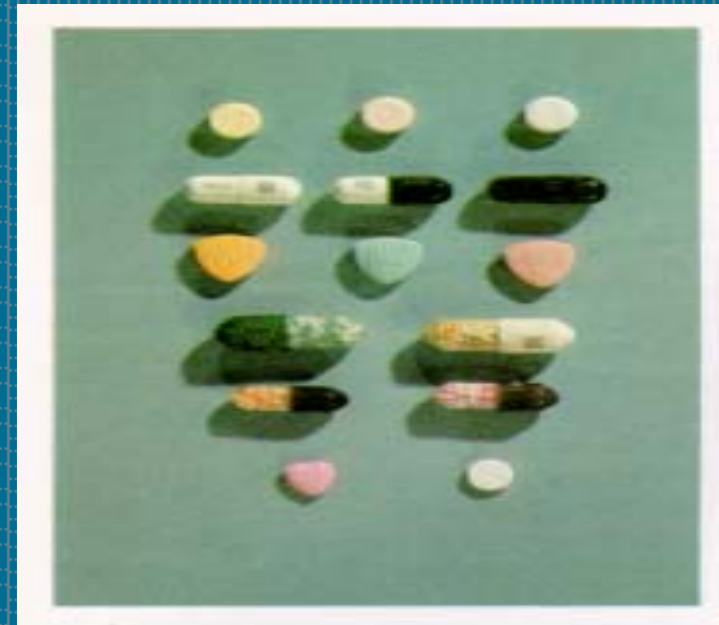

# ***\$OBERING DATA***

---

Abuse of tobacco and other drugs  
(ATOD) costs the United States in  
excess of 1/2 trillion dollars

Looks like this:

\$500,000,000,000.00+



# ***SOBERING DATA***

---

Approximately 60% of all boards of nursing disciplinary cases involve possible substance misuse, abuse, etc.



# ***SOBERING DATA***

---

603 Nurses currently active  
w/TPAPN

× 20 APNs

× 138 LVNs

× 445 RNs

*We have met the enemy . . .*

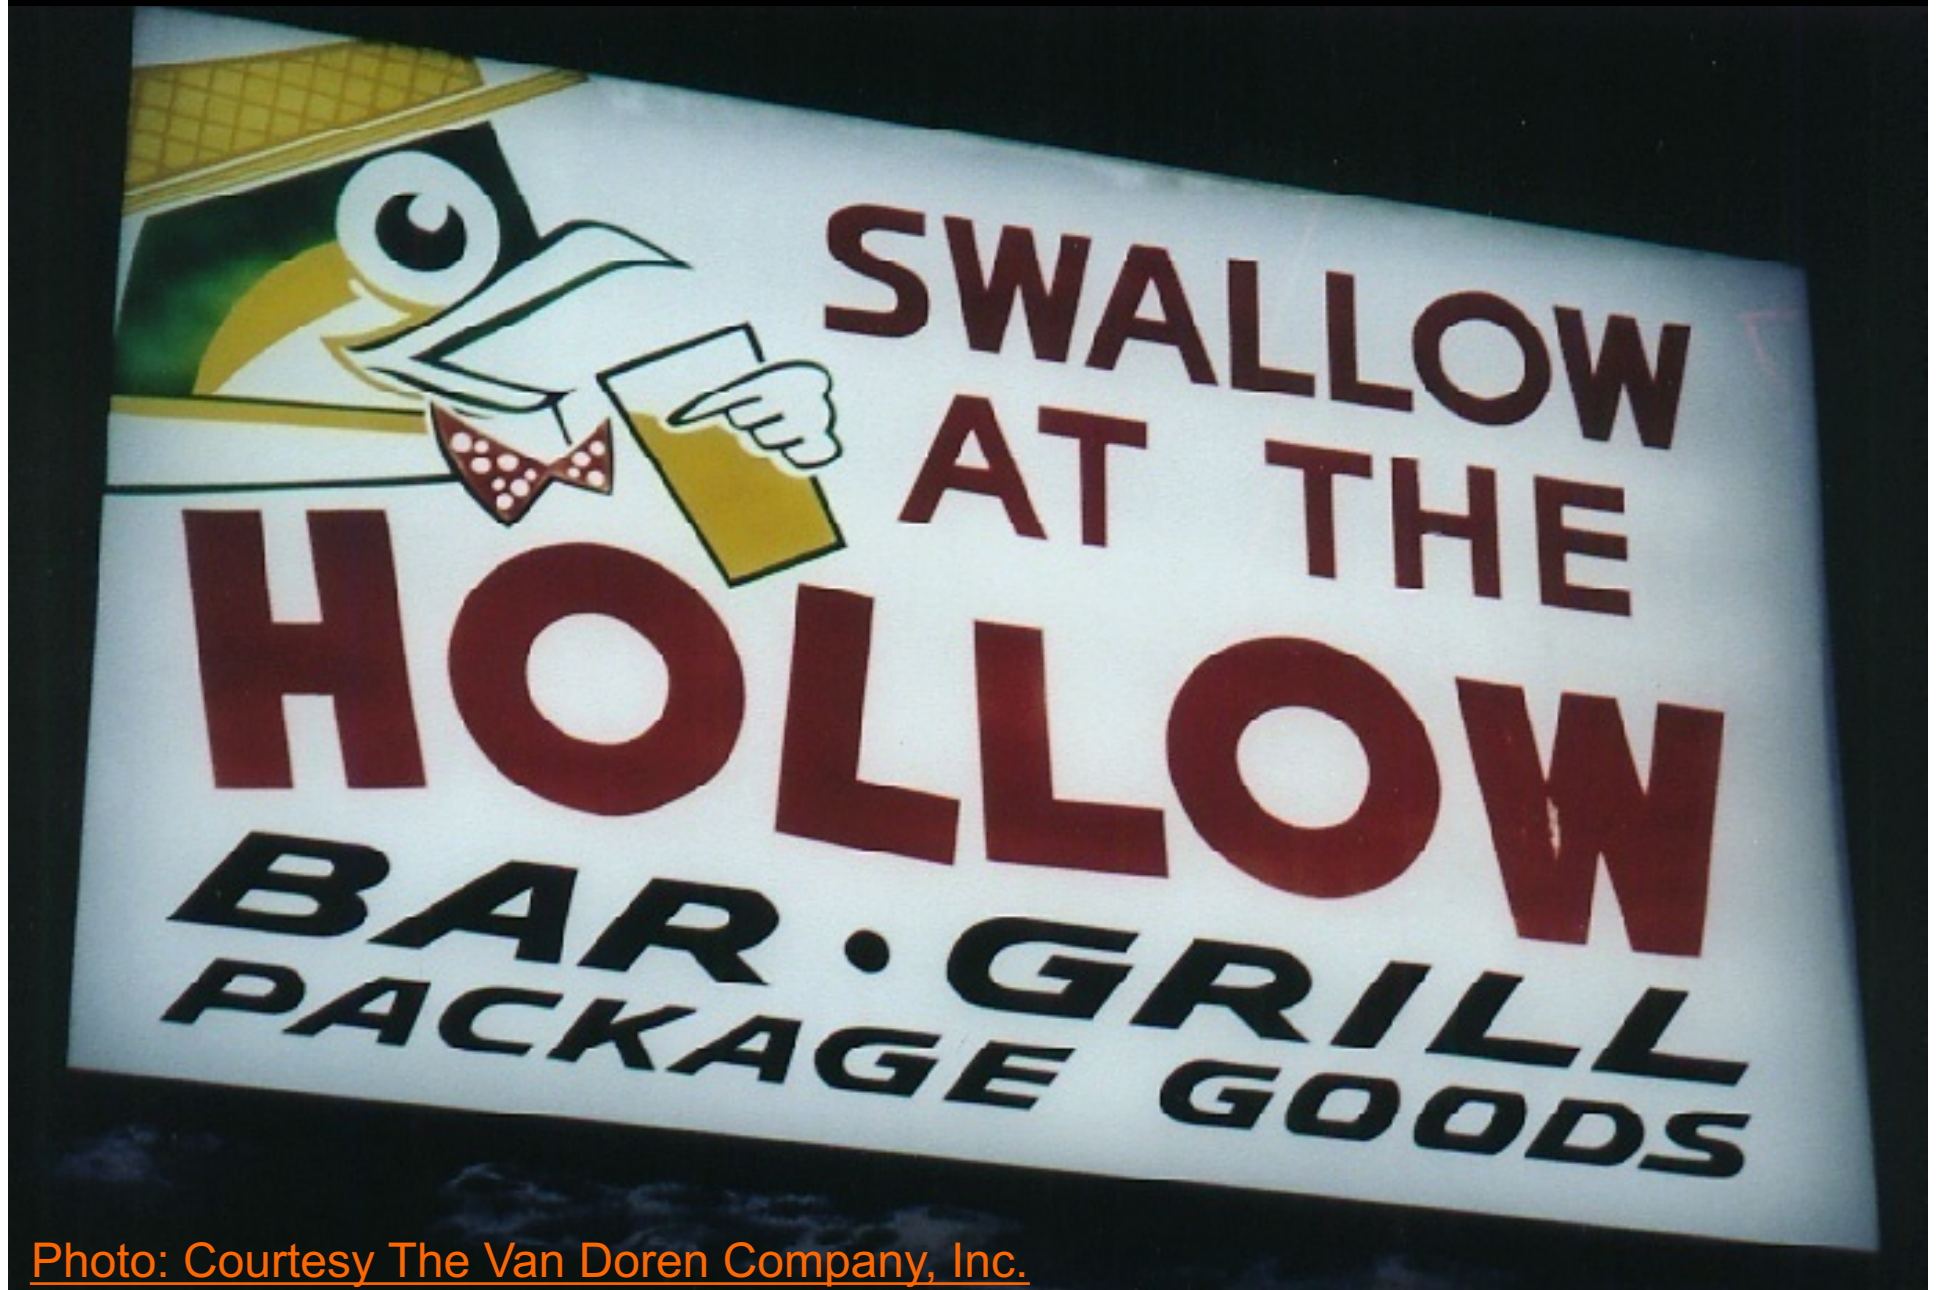

Photo: Courtesy The Van Doren Company, Inc.



# SUDS = A BRAIN DISORDER

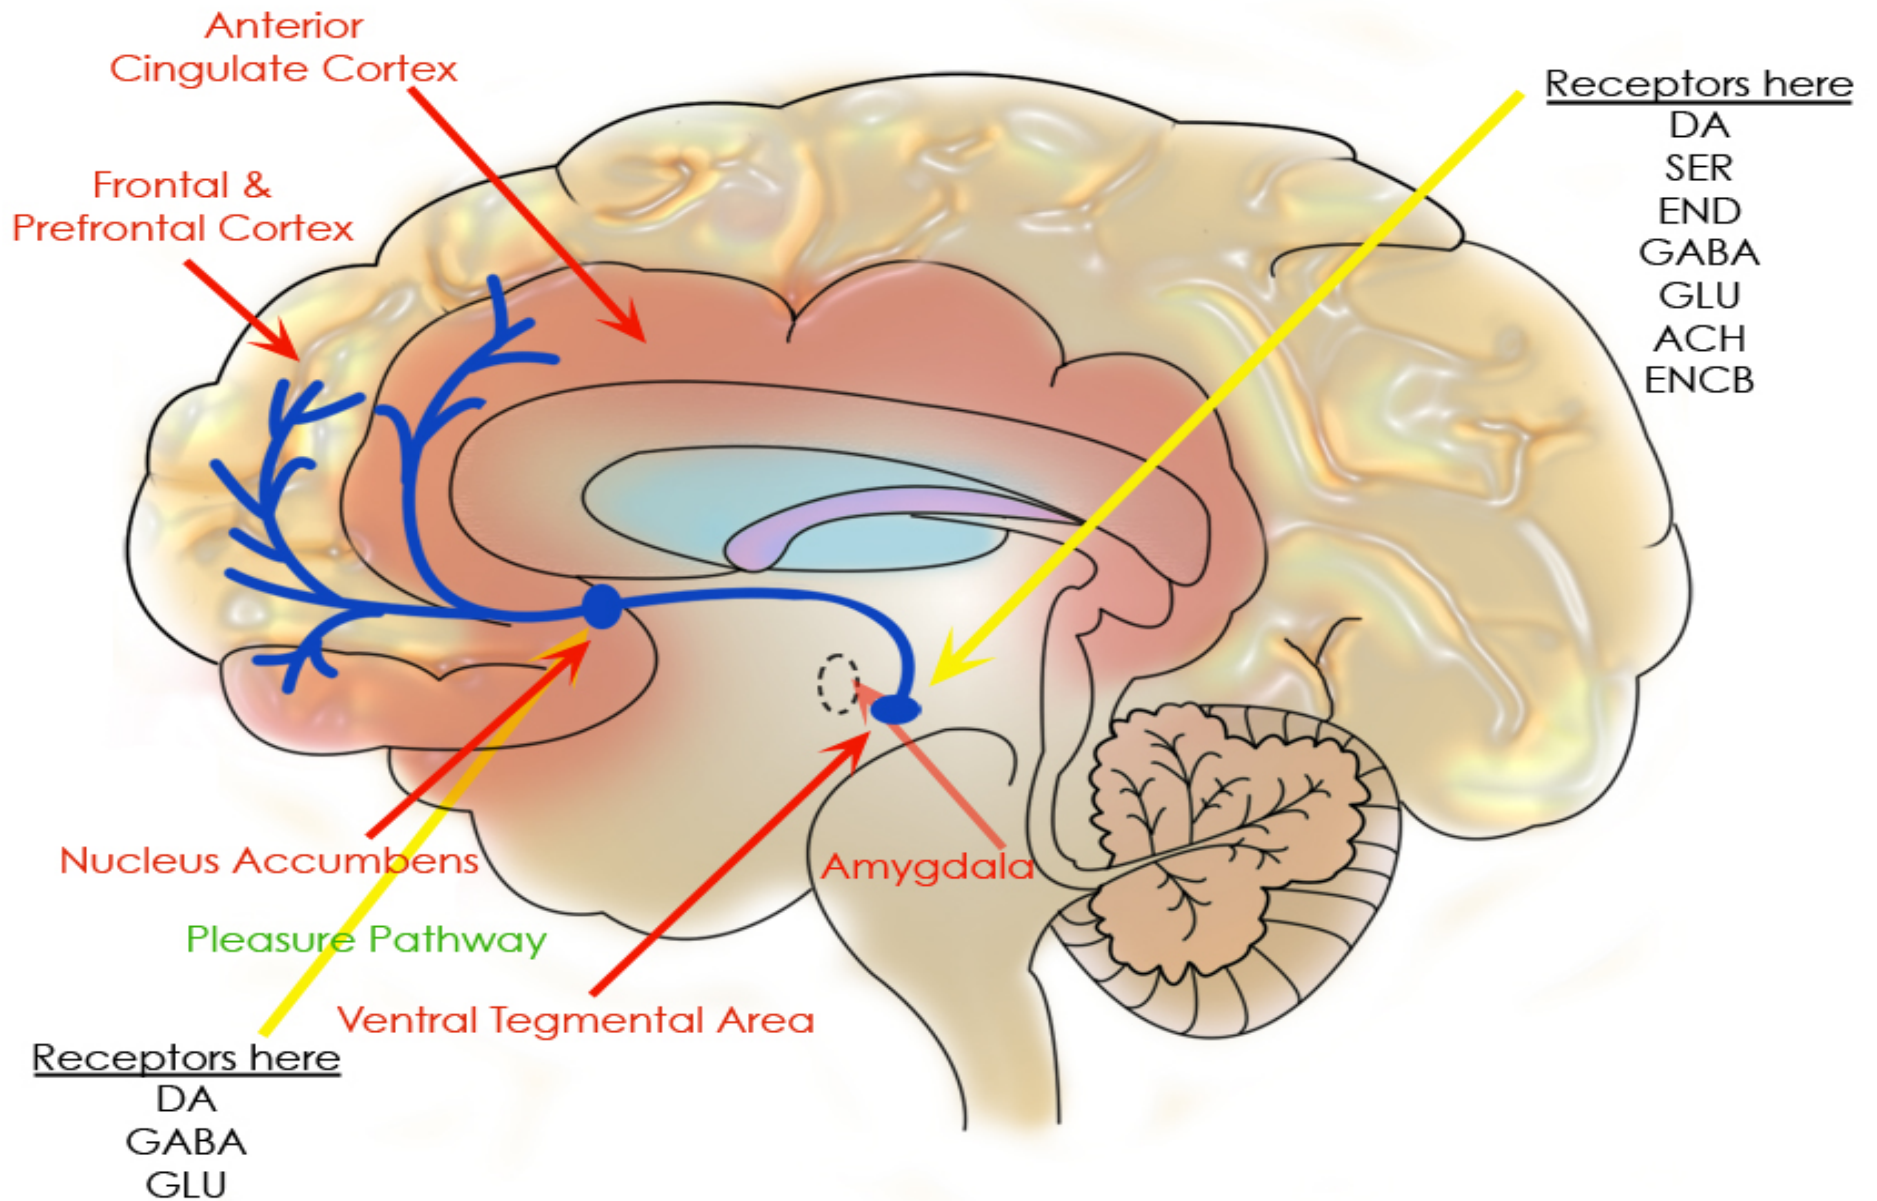



# DRUGS ALTER BRAIN FUNCTION

- 1. Flood brain with excess neurotransmitters (nts)**
- 2. ↑ # receptors for certain nts**
- 3. ↑ sensitivity to certain receptors → craving**
- 4. ↓ receptor availability → tolerance**
- 5. Inhibit production of nts**

Courtesy of Hazelden

# DRUGS ALTER BRAIN FUNCTION

CONTINUED

- 6. Bind to receptors in place of nts**
- 7. Block nts from entering or leaving neuron**
- 8. Empty nts from areas of cells where stored causing the nts to be destroyed**
- 9. Interfere w/reuptake sys. by preventing nts from returning to sending neuron**

Courtesy of Hazelden



# DRUGS ALTER BRAIN FUNCTION

CONTINUED

**And we wonder**

**why**

**the “addict”**

**does**

**more**

**of the same**

**“stupid”**

**things**

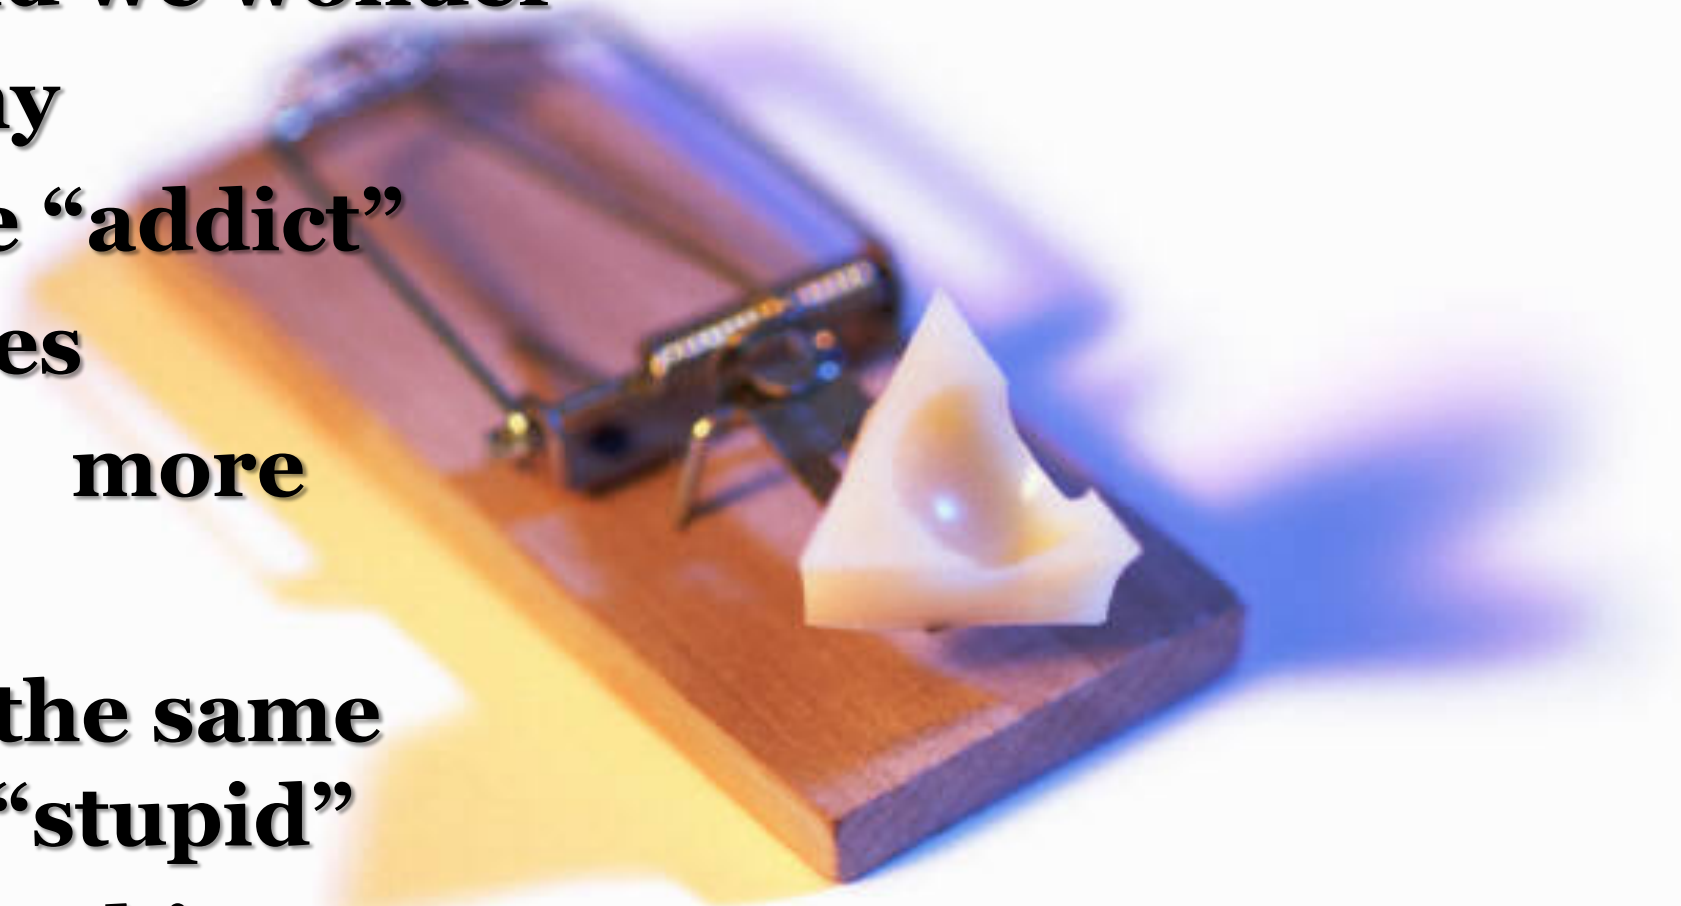



A vibrant, abstract micrograph showing a complex, crystalline structure of dopamine. The image features a central point from which multiple arms radiate outwards, each composed of overlapping, translucent layers in shades of red, orange, yellow, and blue. The overall appearance is that of a highly detailed, multi-colored geometric pattern.

# **Risk Factors for Nurses & Substance Use Disorders**

Microphotograph – Dopamine - courtesy M. Davidson – F.S.U.



# HOW WELL DO YOU KNOW . . .

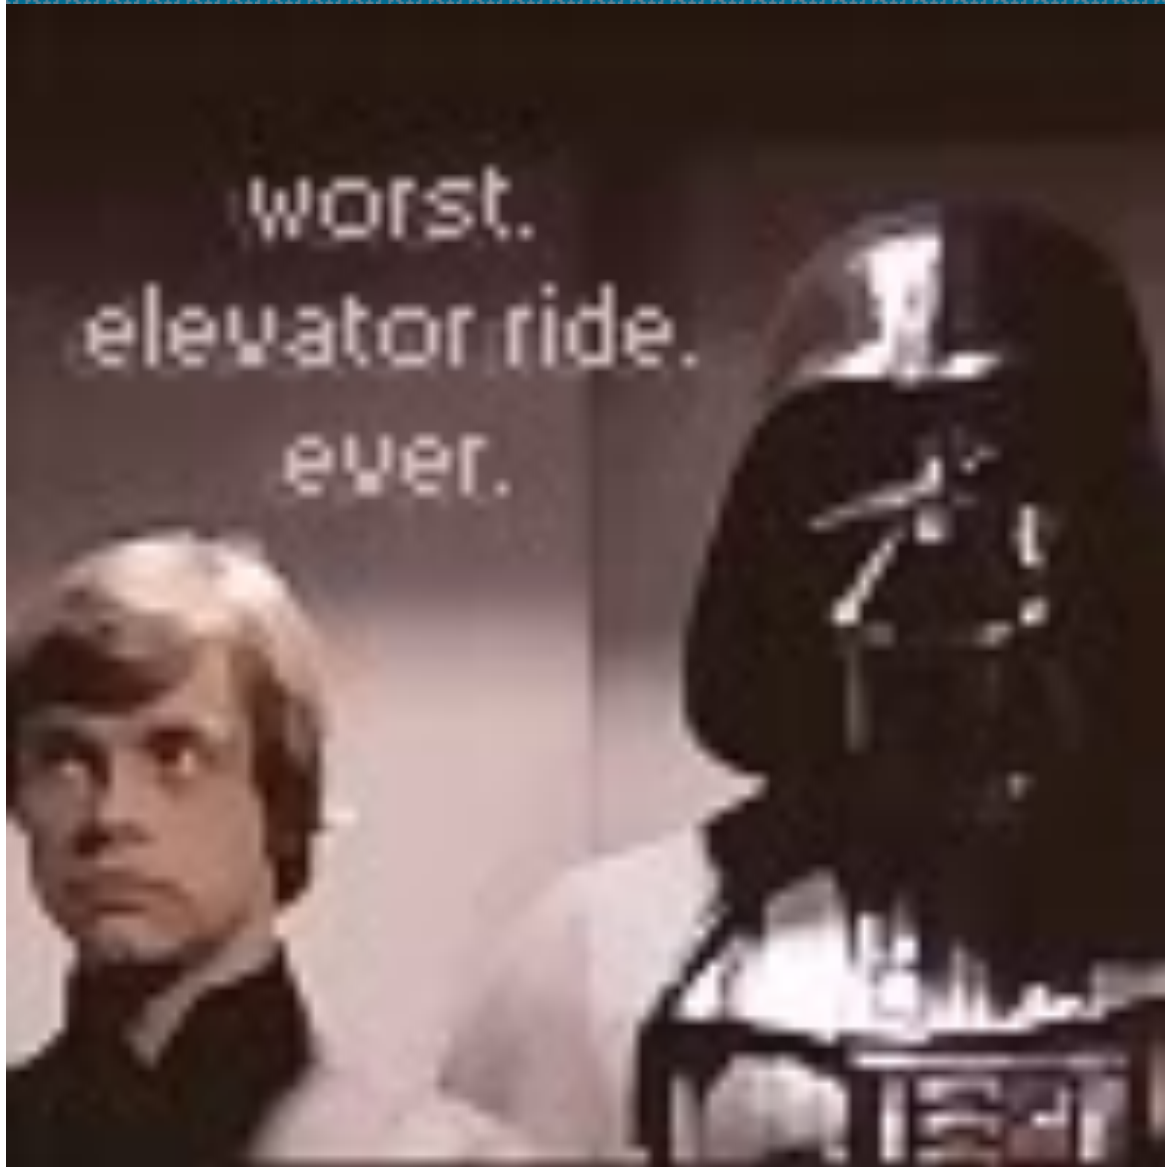

Who you are  
working  
with?

# RISK

---

- ✦ No single factor can predict if someone, let alone a nurse, will become addicted to drugs or alcohol, however . . .



# RISK FACTORS FOR NURSES

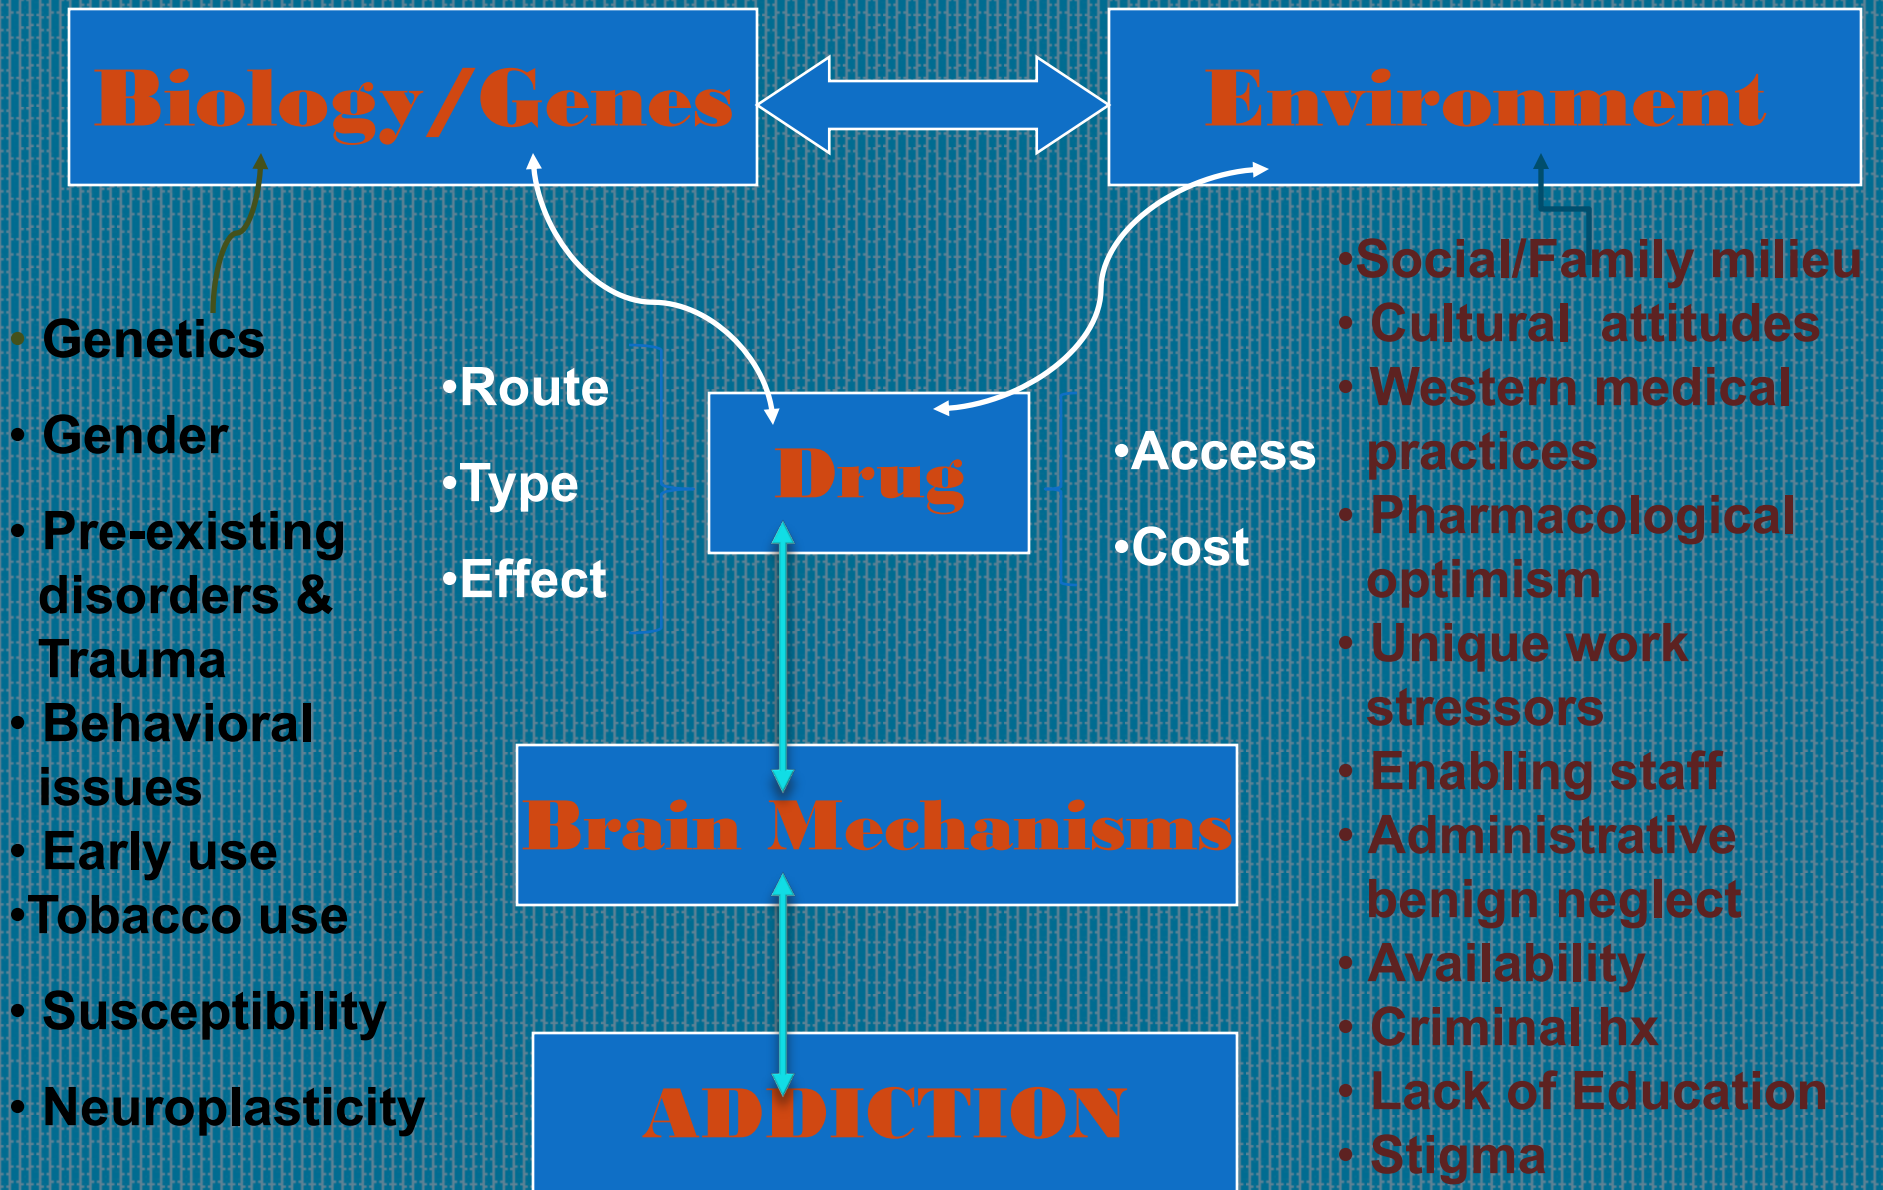

Based on NIDA slide 2007

## ***PUT YOUR HIGH BEAMS ON FOR:***

1. Hx: Physical, emotional, or sexual abuse
2. Personal/family hx: MDD or anxiety d/o
3. Family hx: SUDs or ASPD
4. Low threshold for adverse bodily symptoms/psycho-somatic complaints
5. Low impulse control
6. Hx of ↑medical/dental interventions
7. Current dysfunctional or chaotic home

*(continued)*



# **AND LOW-BEAMS THROUGH THE FOG**

8. Regular contact w/high-risk people or high risk activities
9. Previous criminal behavior
10. Prior tobacco use
11. Previous treatment for SUDs
12. Pain clinic treatment
13. Hx automobile accidents/DWIs



*Identifying  
the Addicted Nurse in the Workplace  
–sometimes it seems like this!*

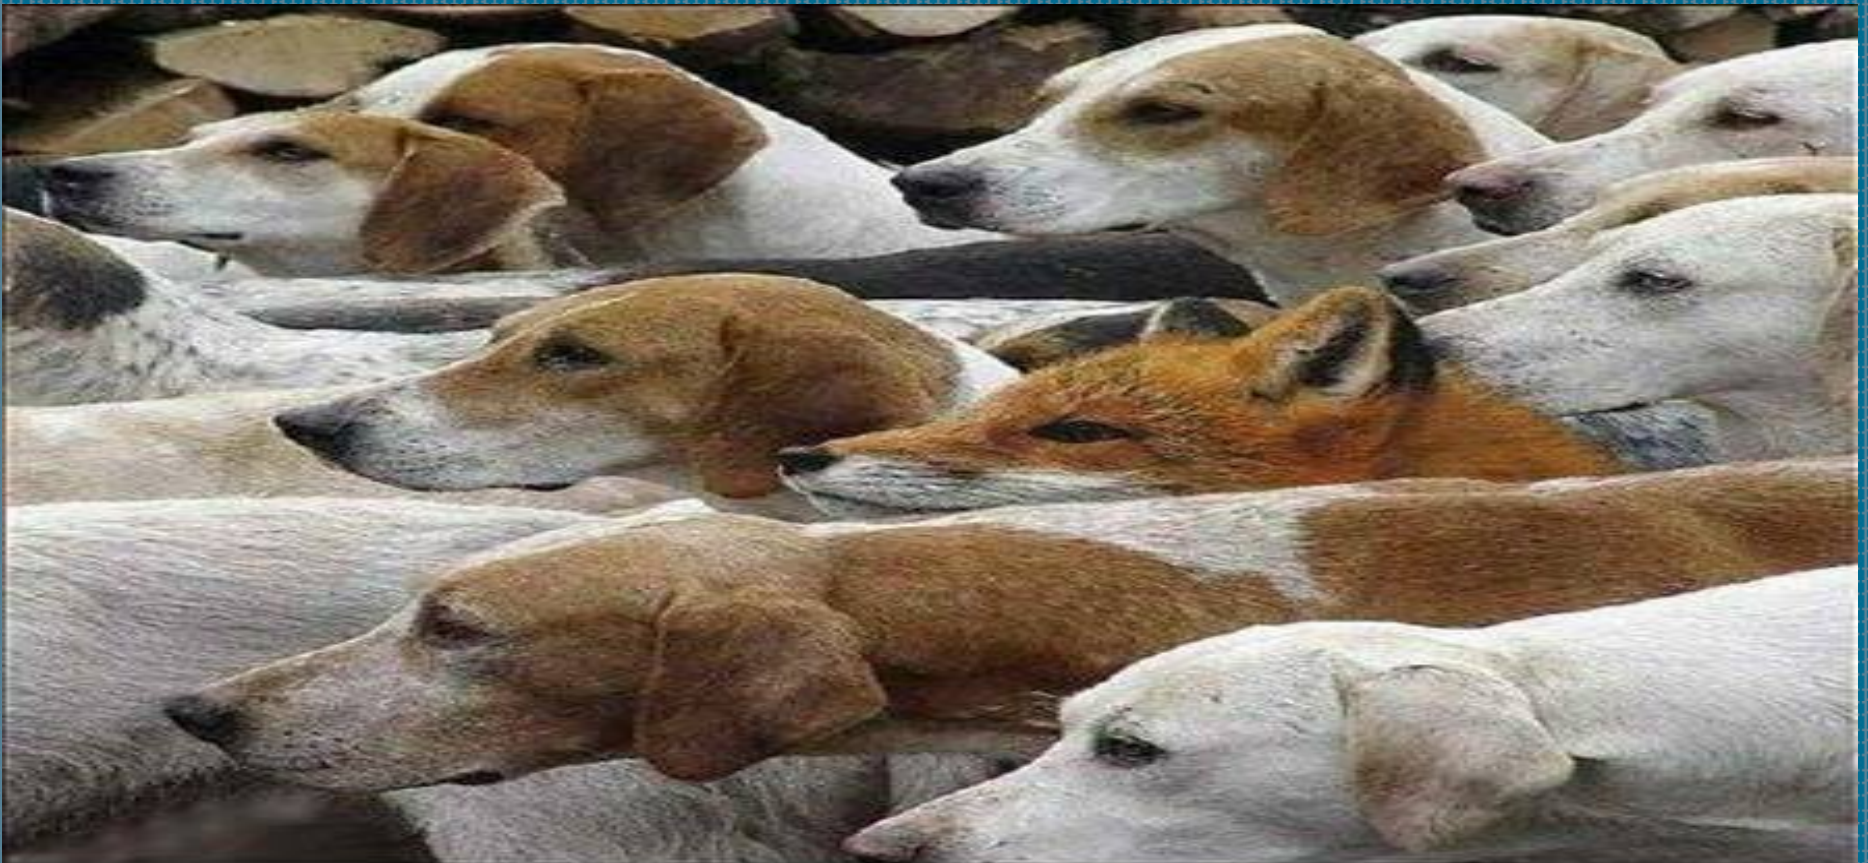

When you are in deep trouble,  
say nothing, and try to look inconspicuous.



# **THE LEARNING CURVE OF LIFE PRINCIPLE**

*There are three kinds of people:*

*the one that learns by reading*

*the few who learn by observation*

*And the rest who have to pee on the  
electric fence for themselves\**

*\*Will Rogers  
Satirist &  
Political  
Pundit*

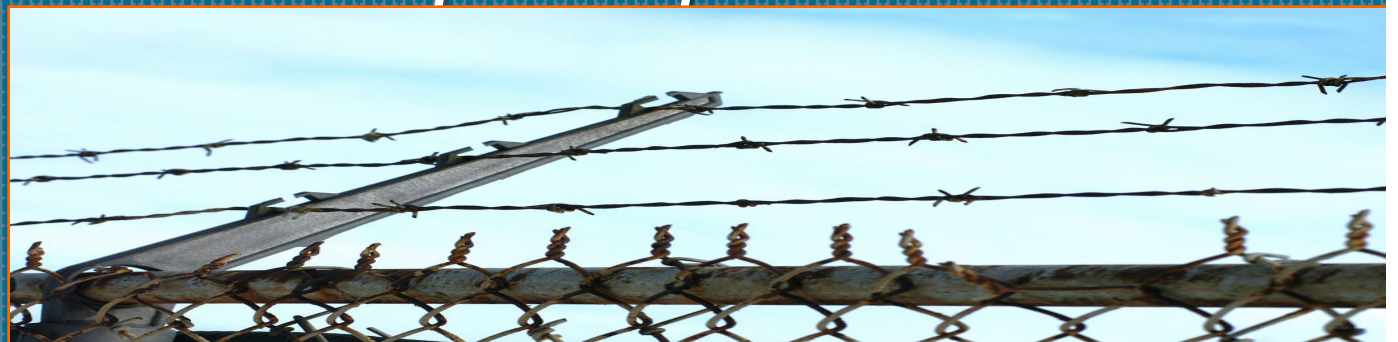

## **TOP 10 CLASSIC SIGNS OF SUDS**

1.  $\Delta$ s in behaviors & practice usually seen before physical  $\Delta$ s
2. Co-workers observe deteriorating pattern/change over time
3. Work - often the last thing “to go”
4. High level of functioning before “hitting bottom”
5. May justify use, i.e., abuse, with Rxs

**(continued)**



# ***Top 10 Classic Signs of SUDs***

## **CONTINUED**

6. Administers ↑ amount of controlled substances – especially PRNs
7. Notable mood swings over course of shift
8. Increasingly isolated over time
9. ↑↑ Problems, Excuses & DENIAL!
10. At work, but not “on the job.”

# ABUSE CHARACTERISTICS

( $\geq 1$  OR MORE OF THE FOLLOWING IN 12 MO. PERIOD)

1. Recurrent use  $\rightarrow$  failure to fulfill major role obligations (work, school or family/home)
2. Recurrent use in physically hazardous situations
3. Recurrent substance-related legal problems
4. Continued use despite persistent or recurrent social/interpersonal problems



# DEPENDENCY CHARACTERISTICS

( $\geq 3$  IN 12 MOS)

1. Tolerance
2. Withdrawal
3. Taken in larger amts than intended or longer than intended
4. Persistent desire or unsuccessful efforts to control use
5.  $\uparrow$ time spent to obtain/use/recover
6.  $\uparrow \uparrow$  social isolation
7. Cont'd use despite adverse consequences:  
Physical and/or psychological

# ***RISK REDUCTION & IDENTIFICATION***

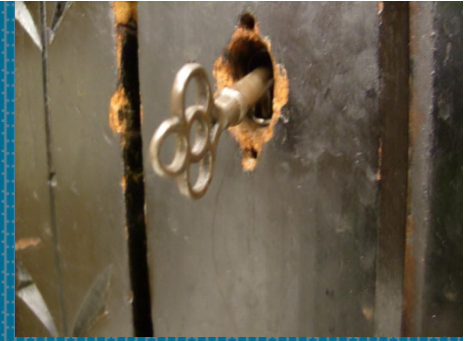

1. P&P to support early identification
2. Screen applicants carefully
3. Pre-employment drug test
4. Publicize signs of substance abuse
5. Provide substance abuse CE regularly
6. For-cause & random drug testing
7. Address concerns/discrepancies with on-time performance counseling



# **RISK REDUCTION & IDENTIFICATION**

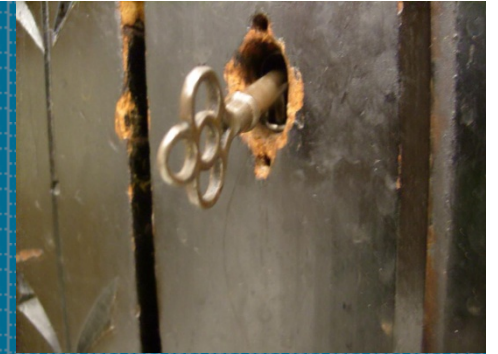

## **CONTINUED**

9. Corroborate/document /intervene RE: Concerns
10. Frequent drug admin. audits w/pharmacy
11. Reference P&P, e.g., drug admin.
12. Utilize your EAP/HR – sooner than later
13. Use “**SBIRT**”
14. Promote smoke-free/drug-free workplace
15. Prohibit work when using controlled substances Rx

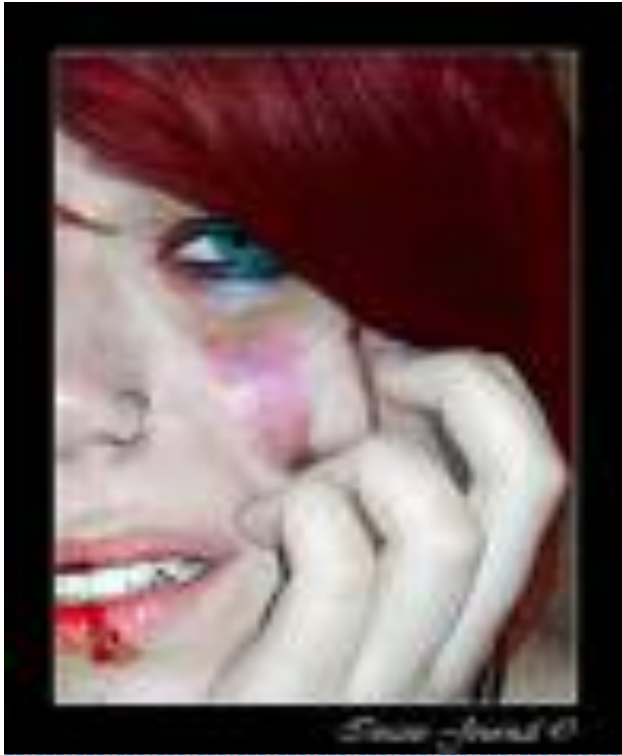

## ***Sometimes it seems like this:***

Some nurses are better than others, which you'll discover quickly, since a new one will be assigned to you every 30 minutes. Apparently, good nurses burn out rapidly. They must be gathered up and shipped to sanitariums, at which point a new supply is whisked in. . .

From: [And How Are We Feeling Today](#) By Kathryn Hammer



# **EMPLOYERS + TPAPN**

Opportunity for nurses to resume nursing practice in an environment that is more safe because the:

- People are Informed
- Practice is Structured
- Predicament is Monitored

# **RE-ENTRY TO PRACTICE: SOMETIMES IT CAN FEEL LIKE THIS!**

Good judgment comes  
from experience,  
and a lot of that comes  
from  
bad judgment.\*

*\*Will Rogers*

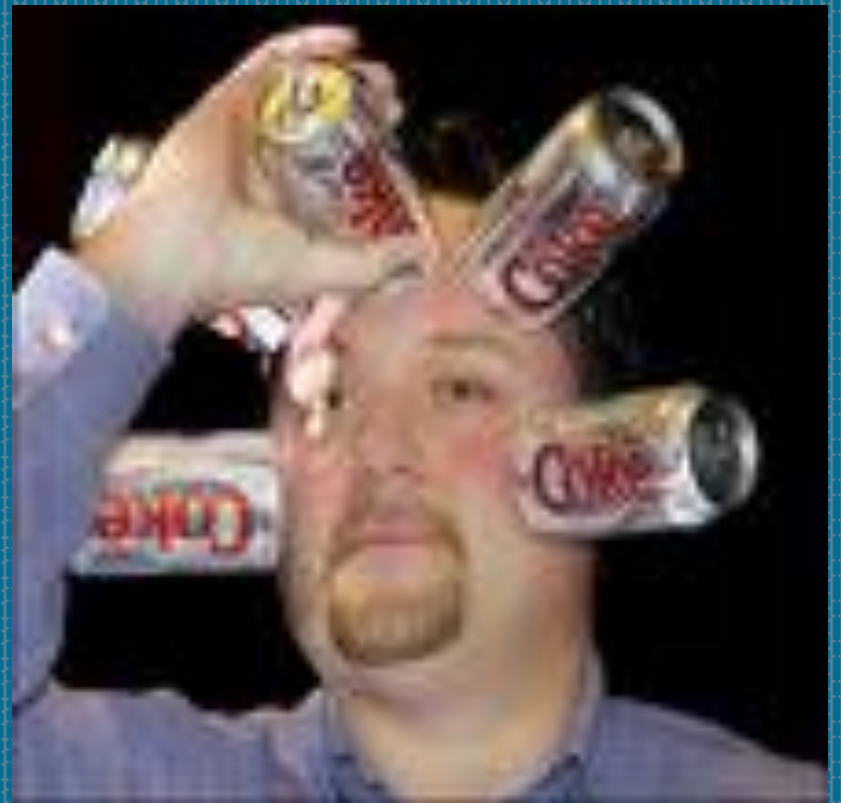



# EMPLOYERS

## Administrative RTW Meeting - Important Points

1. Discuss w/TPAPN case manager
2. Work suspension until TPAPN okays
3. Job duties/concerns
4. Practice environment fit
5. RTW agreement/restrictions  
(accommodations)
6. Advocate availability
7. Ensure Admin./HR sign off hire
8. EAP/HR involvement

# Administrative RTW Meeting - Important Points

continued

9. Ensure understanding of RTW
10. Identify *work monitors*
11. For-cause UDS (people & process)
12. Any modifications?
13. Nurse held to all P & P
14. Opportunity for nurse to identify:
  - Possible relapse triggers
  - Possible cues to relapse



# EMPLOYERS

## Clinical RTW Meeting - Important Points

1. Held after admin. RTW mtg. & before actual start of practice
2. Held on need-to-know basis
3. Evaluate resistance/driving forces
4. Opportunity for nurse to *briefly* disclose & express thanks/hopes
5. Advocate present ideally
6. Co-workers are first-line of defense

(continued)

# CLINICAL RTW MEETING - IMPORTANT POINTS CONTINUED

7. Establish “work exchange” (buddy)
8. Education for admin./staff
9. Co-workers are first-line of defense



# RETURN TO WORK RESTRICTIONS\*

- 1) No autonomous or unsupervised role
- 2) SUDs or Dual Dx: 6 mos. no access to controlled substances
- 3) No shifts longer than 12 hours
- 4) No scheduled OT or on-call for 6 mos
- 5) No nights
- 6) No floating – or only limited – with other unit signing RTW

\*Determined on individual basis - may be modified or waived

(continued)

# ***RETURN TO WORK RESTRICTIONS\****

## **CONTINUED**

- 7) No multiple employers or self-employment
- 8) No staffing agencies or registries
- 9) Special RTW addenda for “nurse anesthesia,” “distributive care,” and “nursing academics”

\*Determined on individual basis - may be modified or waived



# MONITORING = SUPPORT

1. Address reporting obligations
2. Uphold RTW agreement/monitoring
3. Meet monthly/quarterly with nurse
4. Communicate with TPAPN
5. *Enforce boundaries, boundaries, . . .*
6. Recognize positive behaviors, but . . .
7. Be alert to reverting to old behaviors
8. Observe: if nothing's changed – then what's changed???

# ***TPAPN & BEHAVIORAL RISK MANAGEMENT: THE BAYLOR EXPERIENCE***

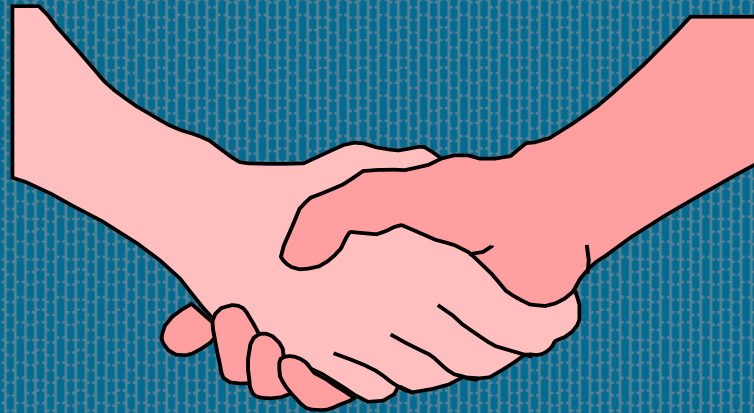

Unpublished Study: Turnover Avoidance and Resulting Cost Savings with RNs  
Participating in Alternative to Discipline Program Employed at Baylor University  
Health Care System, Dallas, Texas (1997-2004)

Mike Van Doren, MSN, RN, CARN, Program Director, Texas Peer Assistance Program for  
Nurses (TPAPN) & Connie Bowling, RN, Program Manager, Psychiatry/Addictive  
Diseases, Baylor University Health Care System, Dallas, Texas



# BAYLOR HEALTH CARE SYSTEM OUTCOMES (1997 – 2005)

Of 96 RNs Identified

81 eligible to participate and signed participation agreement

- 59 Chemical Dependency
- 22 Mental Illness

# BAYLOR HEALTH CARE SYSTEM

## OUTCOMES

**38** successfully completed TPAPN

**16** remain active and compliant in TPAPN

**11** resigned in good standing during participation

**65/81 = 80% Success Rate**

**16** referred to BNE/employment terminated



# **BAYLOR HEALTH CARE SYSTEM** **ESTIMATED TURNOVER COST** **AVOIDANCE**

**Given @80% success rate as measured by documented good performance & adherence to TPAPN over @9 yr period,  
For a total cost savings =**

**\$4,160,000**

# **RELAPSE POTENTIAL IS VERY REAL**

1. Exacerbation of disease is normal!
2. Narrow focus of TPAPN intervention
3. Enabling profession
4. Poor capacity for self-care
5. Patient:staff ratios & ↑pt acuity
6. ↓ finances/health benefits
7. Limitations of affordable treatment
8. 1st two years = early/fragile time
9. ↑ Risk of suicide first two years
10. ↑ risk w/poly-substance abuse & injectable hx



# RELAPSE IS A PROCESS –

## NOT AN EVENT:

**It involves Feeling, Thinking, Doing**

“Addicts” have compliance outcomes comparable to people w/other chronic illnesses

*Exacerbation of disease will happen to most, to some degree*

# “RELAPSE”: DRUG ADDICTION VS. OTHER CHRONIC ILLNESSES

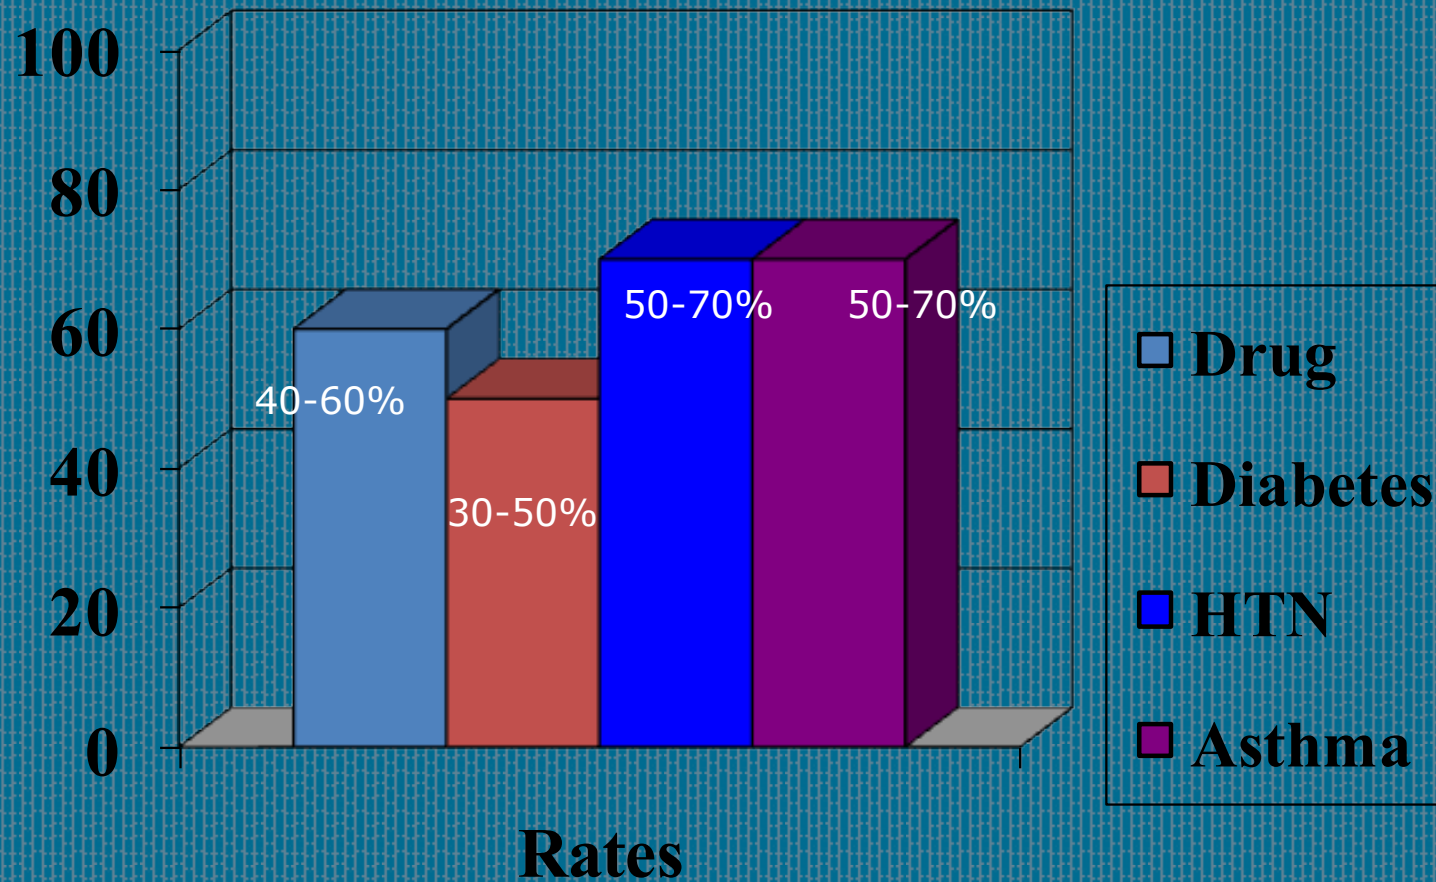

Source: McLellan, et al, JAMA 2000



# **THE RELAPSE PRINCIPLE**

*If you find yourself in a hole,  
the first thing to do is stop  
diggin'.\**

*\*Will Rogers*

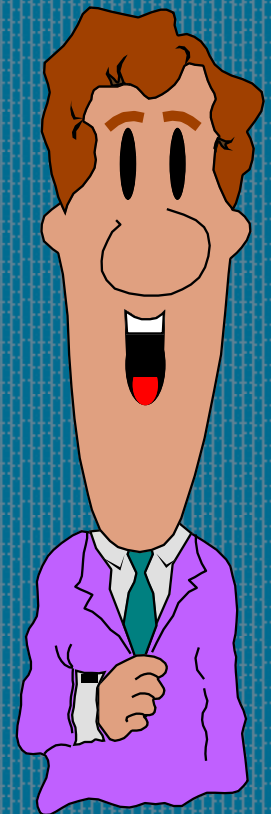

# **RE-ENTRY TO PRACTICE**



- Familiarize self w/RTW contract
- Talk with TPAPN case manager
- ID/Talk with internal monitors
- ID nurse's TPAPN Advocate
- Consult w/HR & EAP
- Hold Administrative RTW mtg.

(Continued)



# **RE-ENTRY TO PRACTICE**



- Hold Clinical RTW meeting
- Develop labor exchange
- Familiarize self w/signs of relapse
- Be aware of the “Abilene Paradox”



# ORGANIZATIONAL RISK REDUCTION

Microphotograph – Acetylcholine - courtesy M. Davidson – F.S.U.



# Top Ten TPAPN Myths

THE ONLY DIFFERENCE  
BETWEEN A PROBLEM AND A  
SOLUTION IS THAT PEOPLE  
UNDERSTAND THE SOLUTION.

- Charles Kettering

# The IMPACT of Curve Balls

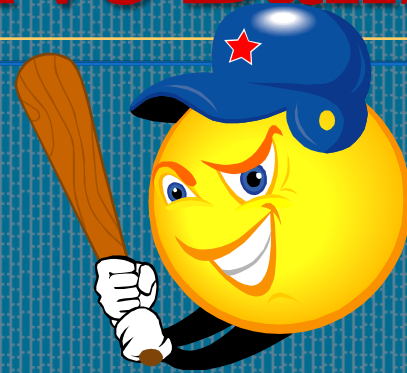

**Nurse's with impaired practice impact:**

- ▶ **patient safety**
- ▶ **safety/morale of co-workers**
- ▶ **legal liability**
- ▶ **financial bottom-line**



**BUT TPAPN CAN OFF-SET  
THE CURVE BALLS**

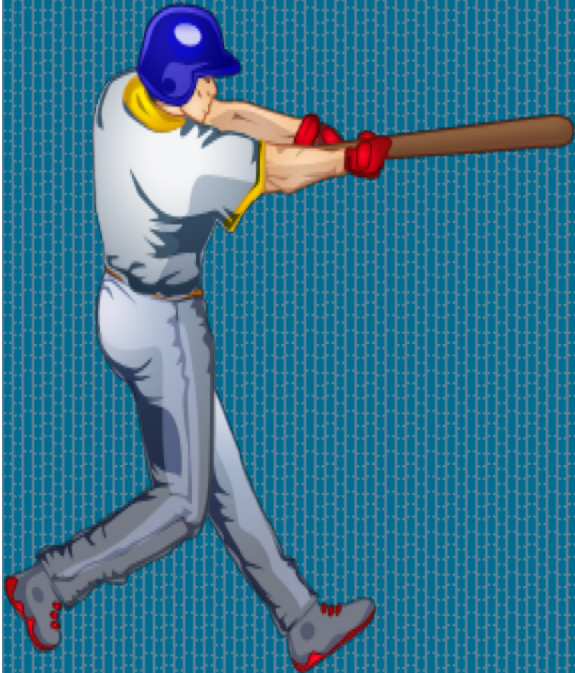

# KEYS TO ORGANIZATIONAL RISK REDUCTION

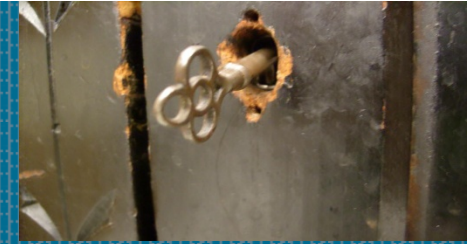

*Astute Management Environment  
Supports:*

1. Pro-active P & P → SUDs & Psych' D/Os
2. Pro-active risk management
3. Timely performance counseling
4. Consultation with TPAPN
5. Regular review of drug admin. P&P
6. CE for staff, HR, pharmacy & administration

continued



# KEYS TO ORGANIZATIONAL RISK REDUCTION

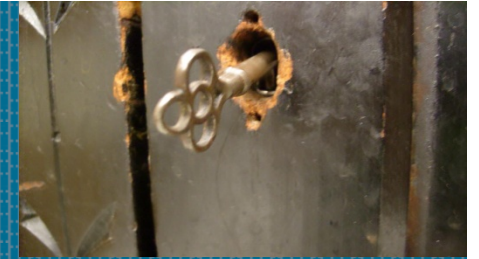

## *Astute Management Environment Supports:*

7. EAP/HR involvement
8. Assessment/treatment resources
9. Intervention Team
10. Advocacy supported
11. Review of TPAPN hires
12. RTW: Structured/Positive
13. Boundary setting/Tough love

# WHY SAVE OUR OWN?

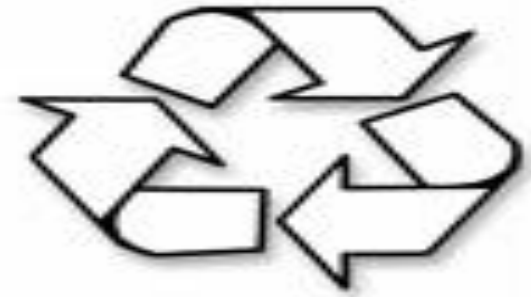

1. Humanitarian
2. Fulfill legal obligations
3. ↑ professional accountability
4. ↑ staff morale
5. ↑ patient safety
6. Loss impacts health care delivery
7. Less costly to retain than throw-away
8. Enhance organizational competencies
9. Enhance personal resiliencies
10. Liability concerns - prudently addressed



# **A NURSE MANAGER'S TESTIMONIAL**

*“Thanks TPAPN, she was a good nurse before but through her recovery and participation, as difficult as it was for her at times, she has become an even better nurse!”*

- ★ *Excerpt from a nurse manager's TPAPN evaluation comments*

# WHY SAVE OUR OWN?

## - A PERSONAL TESTIMONY

“... thank you for giving me the opportunity to learn about my disease and how to cope with life’s imperfections ... I am sure this will be a tough time for me and my family, but I also remember the hurt and pain I caused ... 2 years ago when I lost my job, and almost my career.... Again, thank you for this program (TPAPN).”

- *Excerpt from a participant’s letter to her case manager*



## WHY SAVE OUR OWN?: A NURSE MANAGER'S PERSONAL TESTIMONY

*“Thanks TPAPN, she was a good nurse before but through her recovery and participation, as difficult as it was for her at times, she has become an even better nurse!”*

- ★ *Excerpt from a nurse manager's TPAPN evaluation comments*

*The*

*End*

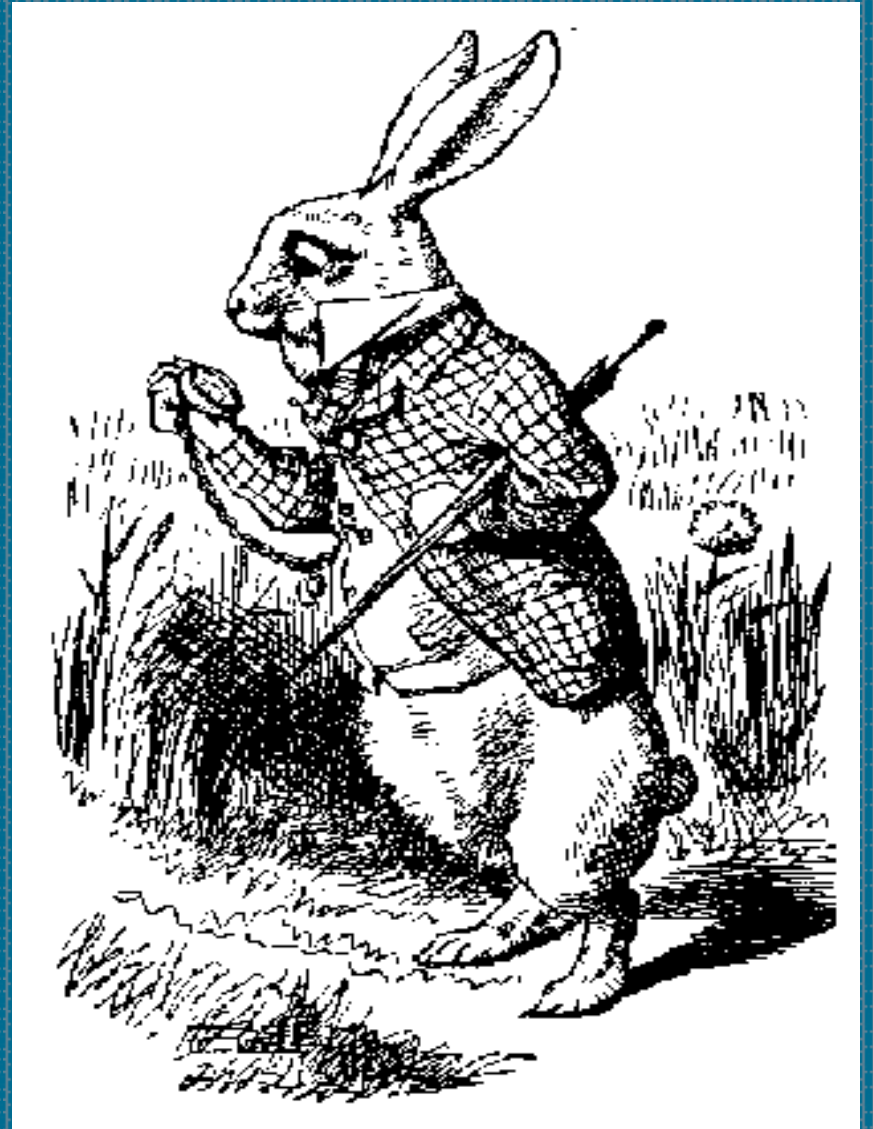

Supplement: NIHMS1010586-supplement-Supplemental_Digital_Content.pdf [file NIHMS1010586-supplement-Supplemental_Digital_Content.pdf]
